# Supplementary material for: Single particle technique for one-step homogeneous detection of cancer marker using gold nanoparticle probes
Source: Royal Society of Chemistry journal article supplement (doi:10.1039/c1an15497d), 2011-01-01
Supplement: c1an15497d.pdf [file c1an15497d.pdf]

# Supporting Information:

Single particle technique for one-step homogenous detection of cancer  
marker using gold nanoparticle probes

Tao Lan, Chaoqing Dong, Xiangyi Huang and Jicun Ren\*

College of Chemistry & Chemical Engineering, State Key Laboratory of Metal Matrix Composites,  
Shanghai Jiaotong University

E-mail: [jicunren@sjtu.edu.cn](mailto:jicunren@sjtu.edu.cn)

*Supporting Figures:*

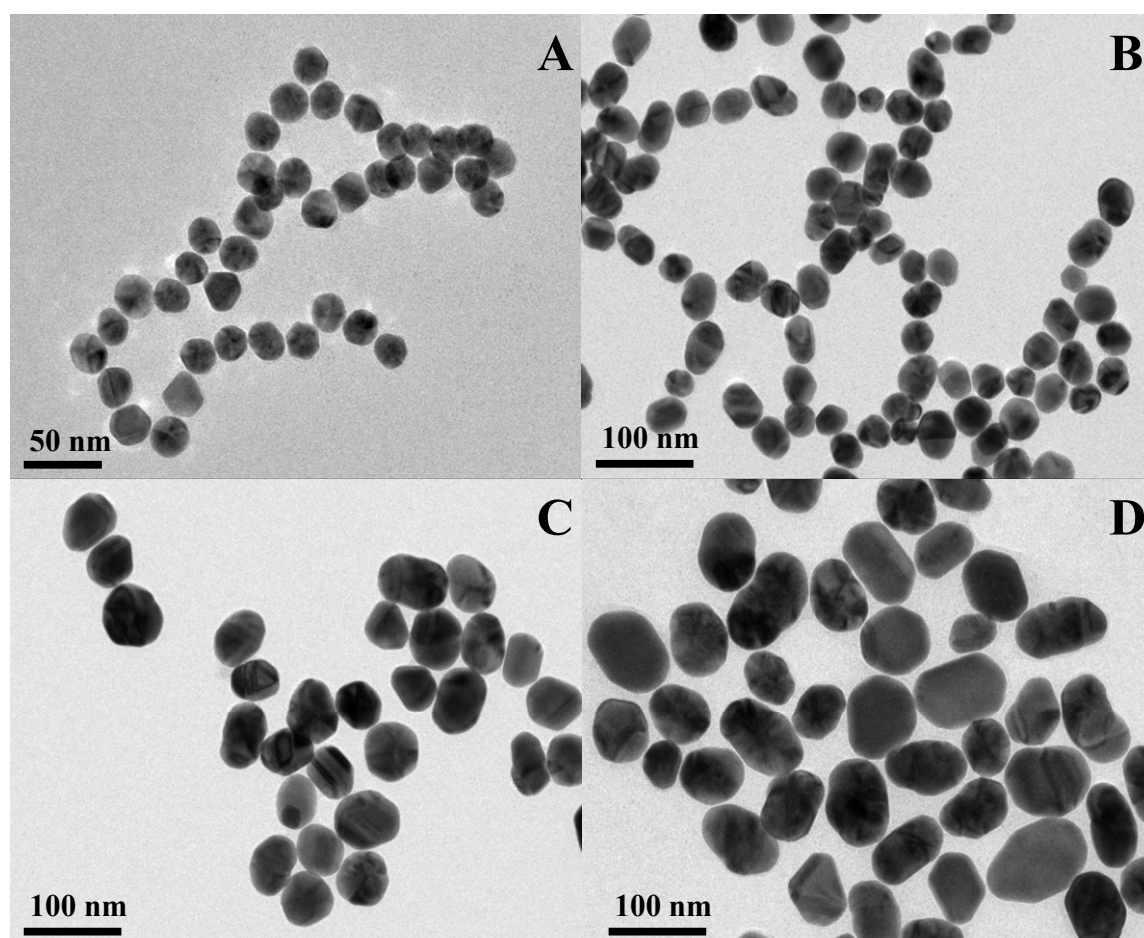

**Figure S1** Transmission electron microscope (TEM) images of GNPs. GNPs diameters in this study are  $16 \pm 3$  nm (A),  $30 \pm 4$  nm (B),  $45 \pm 4$  nm (C) and  $55 \pm 8$  nm (D), respectively.

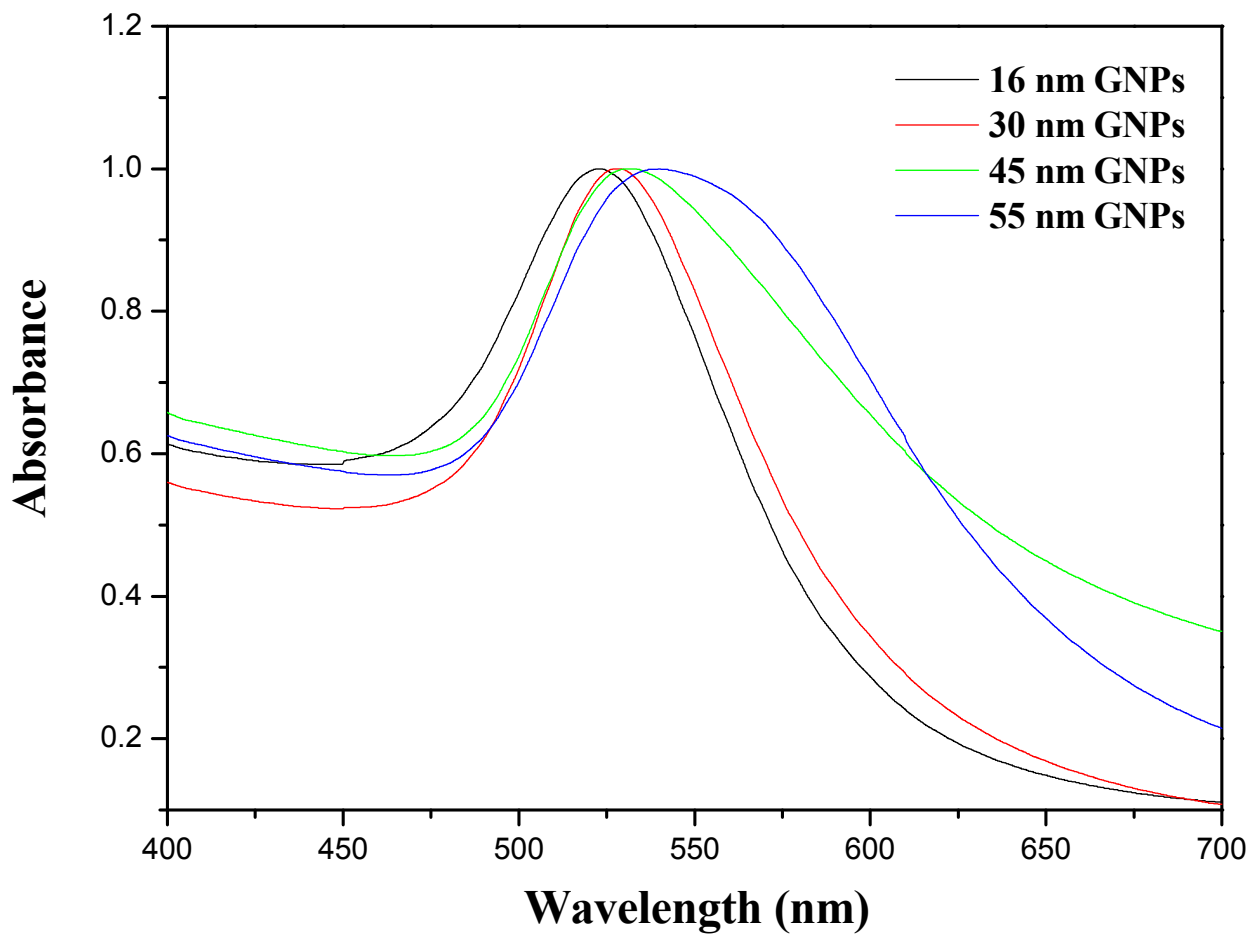

**Figure S2** UV absorption spectra of GNPs.

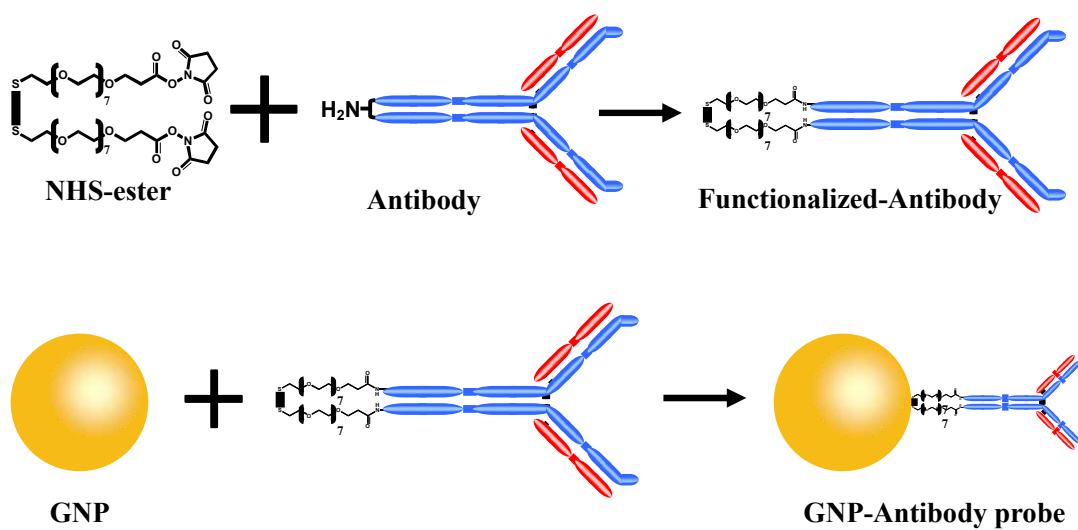

**Figure S3** The procedure for conjugation of GNPs to antibodies. NHS-ester expresses 4, 7, 10, 13, 16, 19, 22, 25, 32, 35, 38, 41, 44, 47, 50, 53-hexadeca-28, 29- dithiahexapentacontanedioic acid di-N-succinimidyl ester and GNP is gold nanoparticle.

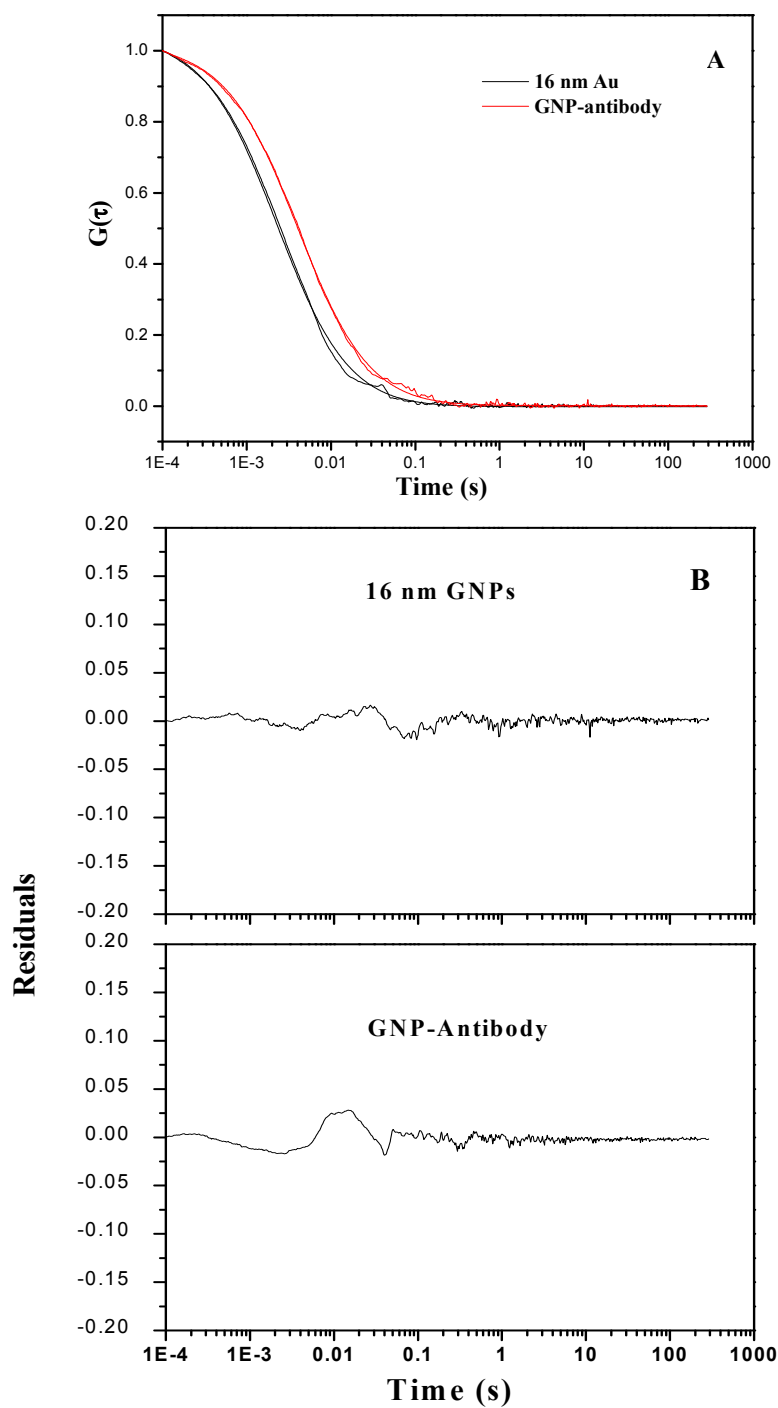

**Figure S4** Characterization of GNP-antibody conjugates by RLSCS. The panel A shows the autocorrelation curves and fitting curves of GNPs and GNP-antibody conjugates. The panel B shows the fitting residuals of autocorrelation curves.

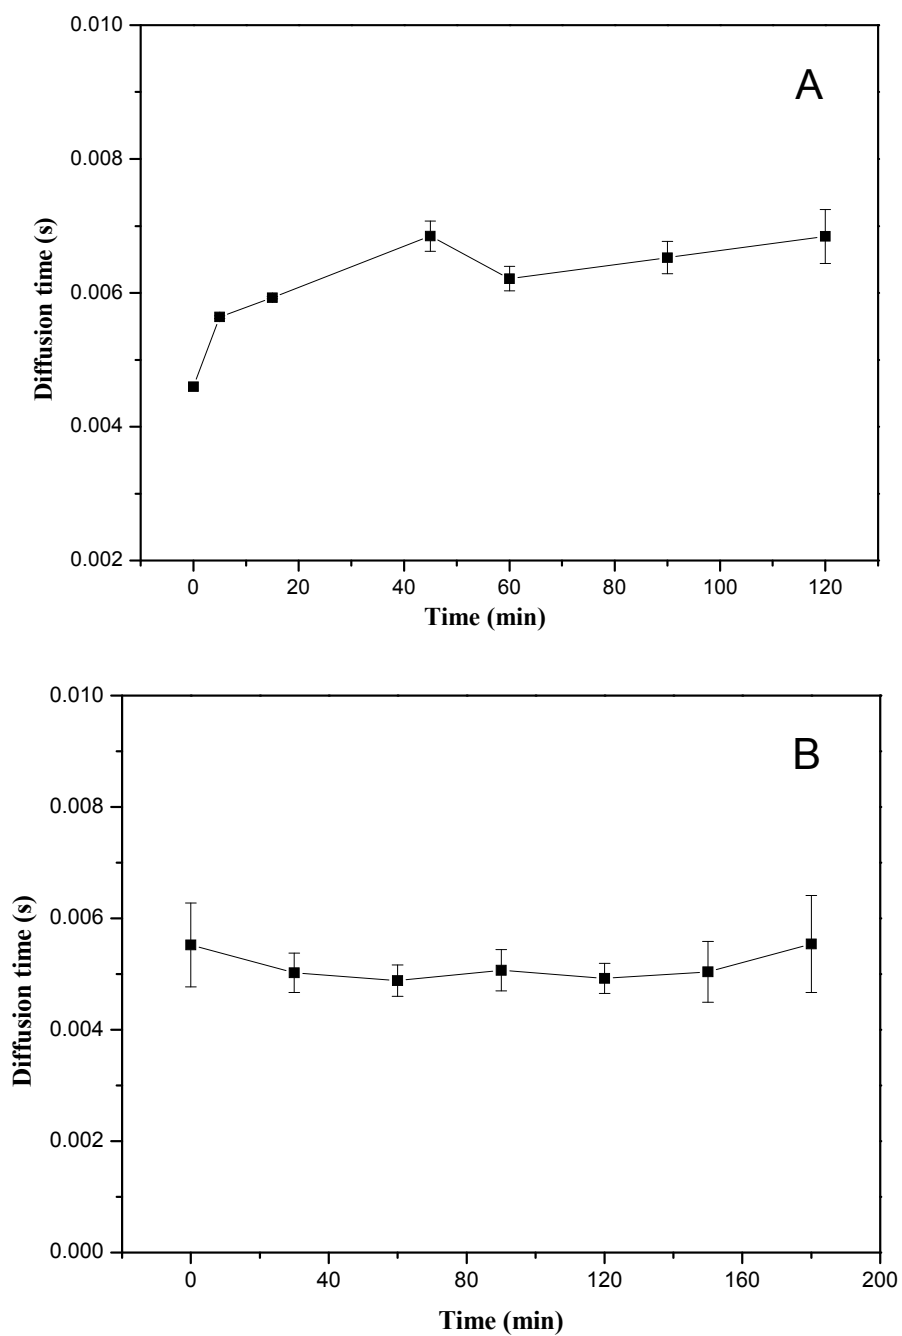

Figure S5 Effects of immune reaction time (A) and the stability of immunocomplexes (B).

In the panel A, the concentrations of GNP-antibodies (1 and 2) were 85 pM, the concentration of AFP was 61 pM, and the incubation temperature was 37 °C. In the panel B, the concentrations of GNP-antibodies (1 and 2) were 85 pM, the concentration of AFP was 6.1 pM, and the incubation temperature was 37 °C.

**Supporting Table:**

Table S1 Recovery results of AFP immunoassays by RLSCS

| Samples | Original<br>amount (M) | Added<br>amount (M)   | Founded<br>amount(M)   | Recovery (%)<br>(n = 3) | RSD (%)<br>(n = 3) |
|---------|------------------------|-----------------------|------------------------|-------------------------|--------------------|
| No 1    | $3.08 \times 10^{-13}$ | $1.0 \times 10^{-12}$ | $1.23 \times 10^{-12}$ | 92.3                    | 9.5                |
| No 2    | $4.66 \times 10^{-13}$ | $1.0 \times 10^{-12}$ | $1.38 \times 10^{-12}$ | 91.7                    | 8.5                |
